# Supplementary material for: Highly efficient Sr3Y2(Si3O9)2:Ce3+,Tb3+/Mn2+/Eu2+phosphors for white LEDs: structure refinement, color tuning and energy transfer
Source: Royal Society of Chemistry journal article supplement (doi:10.1039/c4ra06538g), 2014-08-18
Supplement: c4ra06538g1.pdf [file c4ra06538g1.pdf]

# Highly Efficient $\text{Sr}_3\text{Y}_2(\text{Si}_3\text{O}_9)_2:\text{Ce}^{3+}, \text{Tb}^{3+}/\text{Mn}^{2+}/\text{Eu}^{2+}$ Phosphors for White LEDs: Structure Refinement, Color Tuning and Energy Transfer

Mengfei Zhang<sup>a, b</sup>, Yujun Liang<sup>a, b, \*</sup>, Rui Tang<sup>c</sup>, Dongyan Yu<sup>a, b</sup>, Miaohui  
Tong<sup>a, b</sup>, Qiang Wang<sup>a, b</sup>, Yingli Zhu<sup>b</sup>, Xingya Wu<sup>b</sup>, Guogang Li<sup>a, b, \*</sup>

<sup>a</sup>Engineering Research Center of Nano-Geomaterials of Ministry of Education, China  
University of Geosciences, Wuhan 430074, People's Republic of China

<sup>b</sup>Faculty of Materials Science and Chemistry, China University of Geosciences,  
Wuhan 430074, People's Republic of China

<sup>c</sup>Shanghai Institute of Applied Physics, Chinese Academy of Sciences,  
Shanghai 201800, People's Republic of China

\*Corresponding author at: Faculty of Materials Science and Chemistry, China University of  
Geosciences, Wuhan 430074, China.

Tel.: +86 27 67884814; fax: +86 27 67883733.

E-mail address: yujunliang@sohu.com; ggli8312@gmail.com

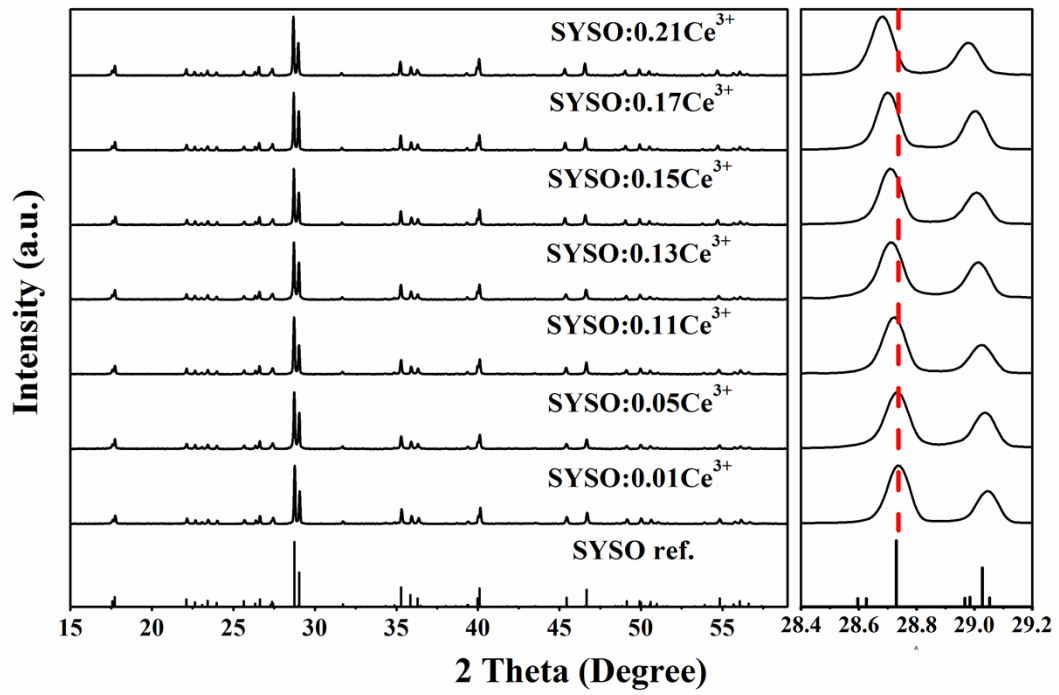

**Figure S1.** XRD patterns of the SYSO host and different Ce<sup>3+</sup>-doped SYSO samples.

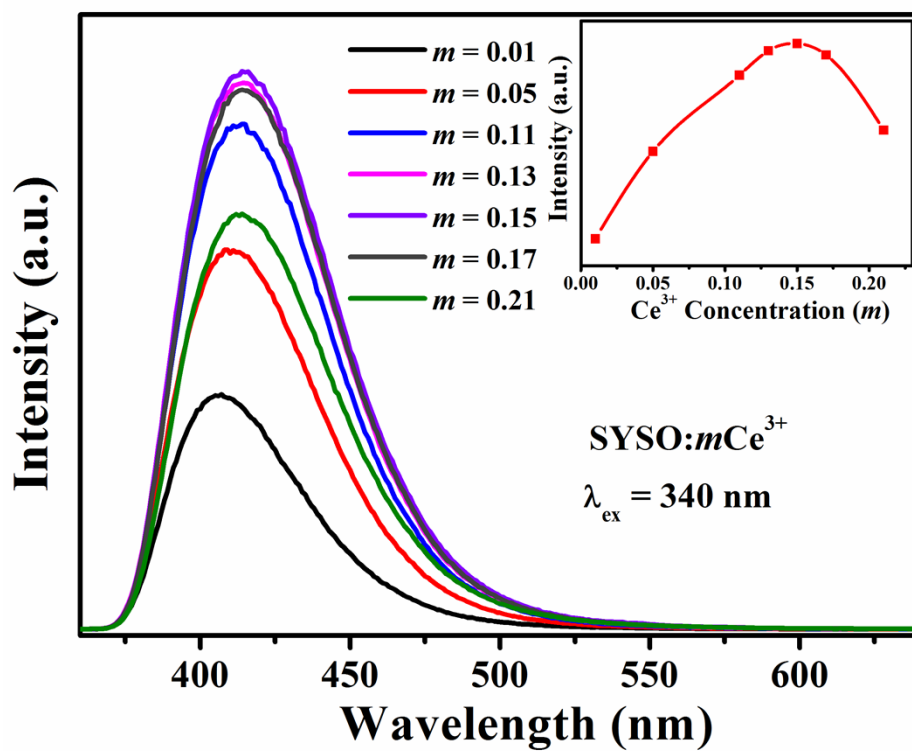

**Figure S2.** The PL spectra of SYSO: $m\text{Ce}^{3+}$  phosphors ( $m = 0.01, 0.05, 0.11, 0.13, 0.15, 0.17$  and  $0.21$ ). The inset illustrates the PL intensity of SYSO: $m\text{Ce}^{3+}$  phosphors as a function of the  $\text{Ce}^{3+}$  doping concentration ( $m$ ).

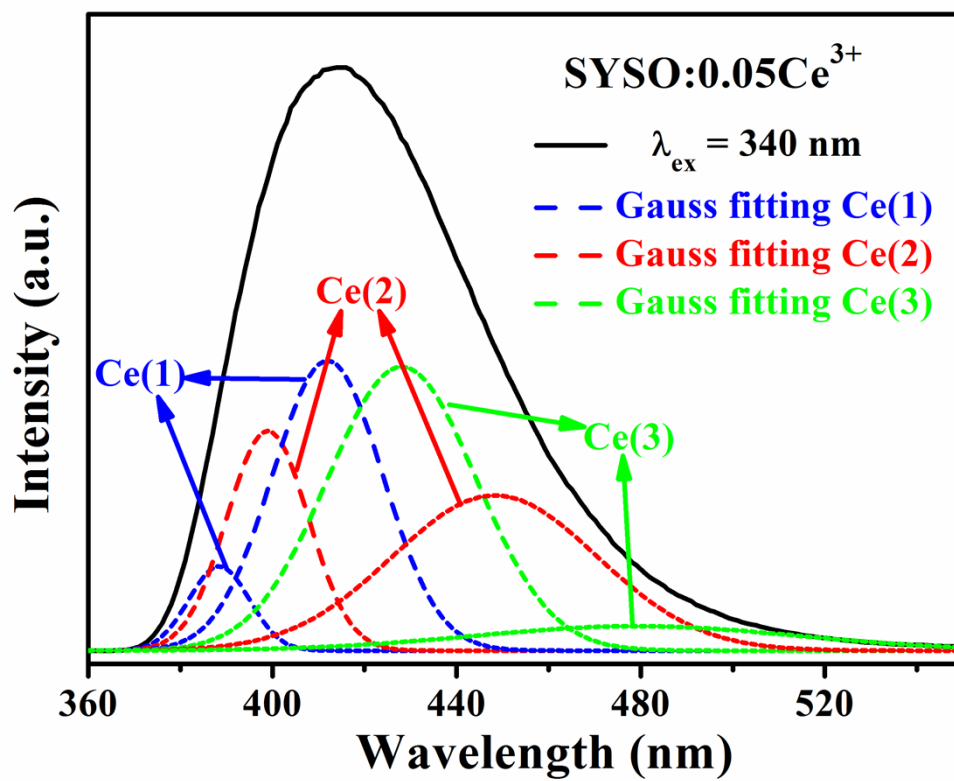

**Figure S3.** The PL spectrum (black solid line) of SYSO:0.05Ce<sup>3+</sup>, together with the six Gaussian peaks fitting (blue/red/green dashed lines) of the PL spectrum.

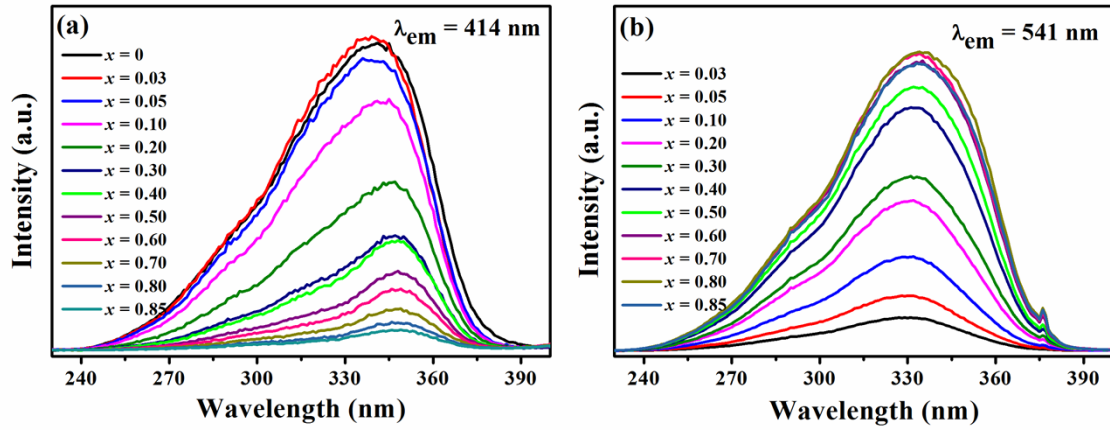

**Figure S4.** The PLE spectra of SYSO:0.15Ce<sup>3+</sup>, xTb<sup>3+</sup> phosphors ( $x = 0, 0.03, 0.05, 0.10, 0.20, 0.30, 0.40, 0.50, 0.60, 0.70, 0.80$  and  $0.85$ ) monitored at different UV. (a)  $\lambda_{em} = 414$  nm; (b)  $\lambda_{em} = 541$  nm.

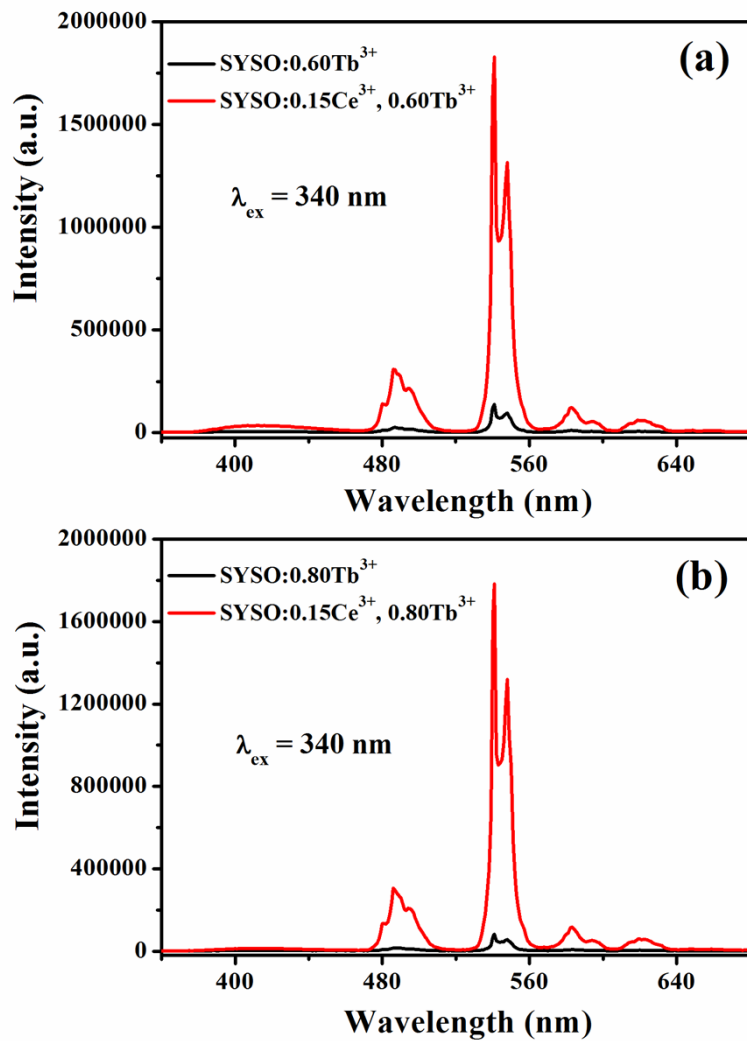

**Figure S5.** (a) The PL spectra of SYSO:0.60Tb<sup>3+</sup> (black line), SYSO:0.30Ce<sup>3+</sup>, 0.60Tb<sup>3+</sup> (red line); (b) The PL spectra of SYSO:0.80Tb<sup>3+</sup> (black line), SYSO:0.30Ce<sup>3+</sup>, 0.80Tb<sup>3+</sup> (red line).

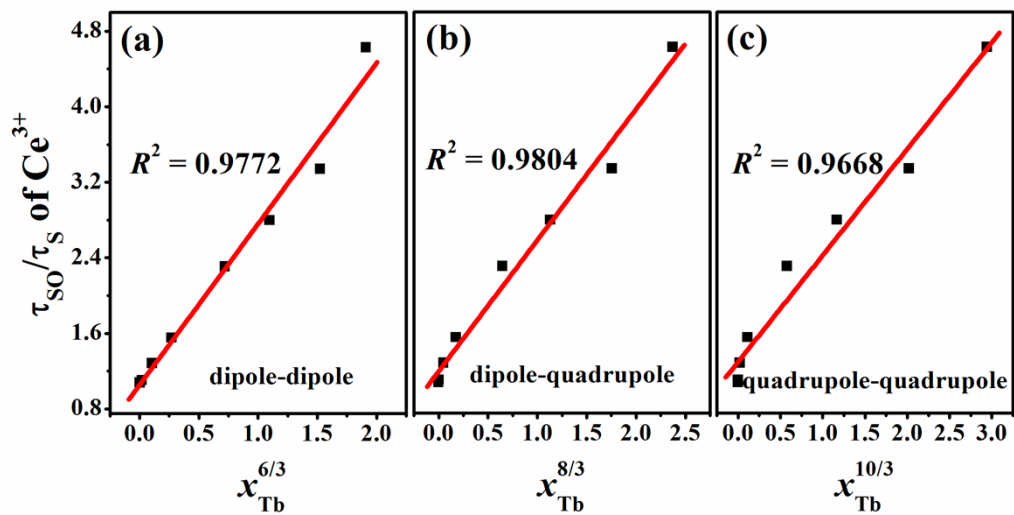

Figure S6. Dependence of  $\tau_{SO}/\tau_S$  of  $\text{Ce}^{3+}$  on (a)  $x_{\text{Tb}}^{6/3}$ , (b)  $x_{\text{Tb}}^{8/3}$  and (c)  $x_{\text{Tb}}^{10/3}$ .

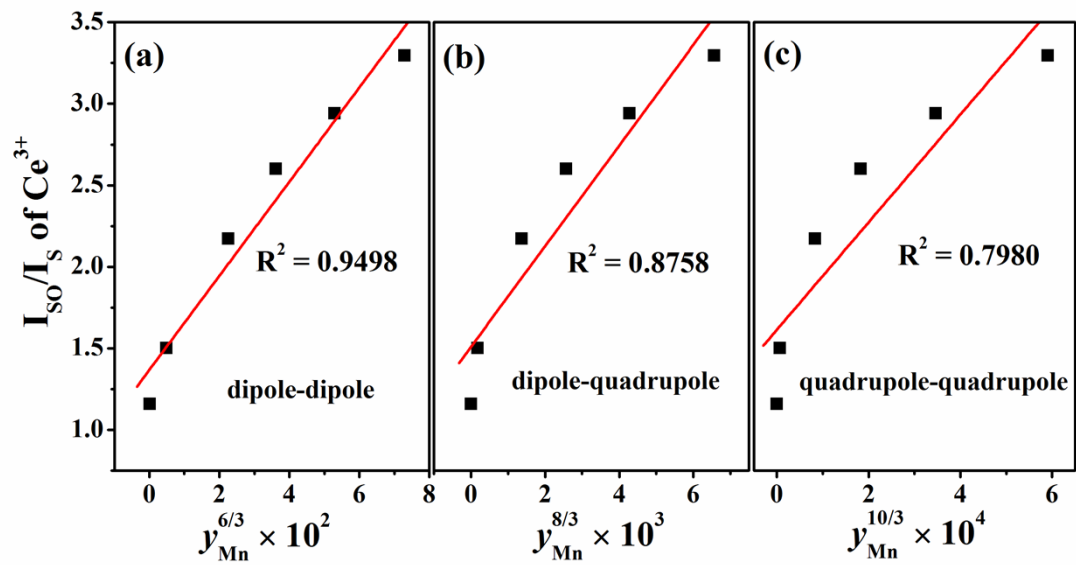

**Figure S7.** Dependence of  $I_{SO}/I_S$  of  $Ce^{3+}$  on (a)  $y_{Mn}^{6/3}$ , (b)  $y_{Mn}^{8/3}$  and (c)  $y_{Mn}^{10/3}$ .



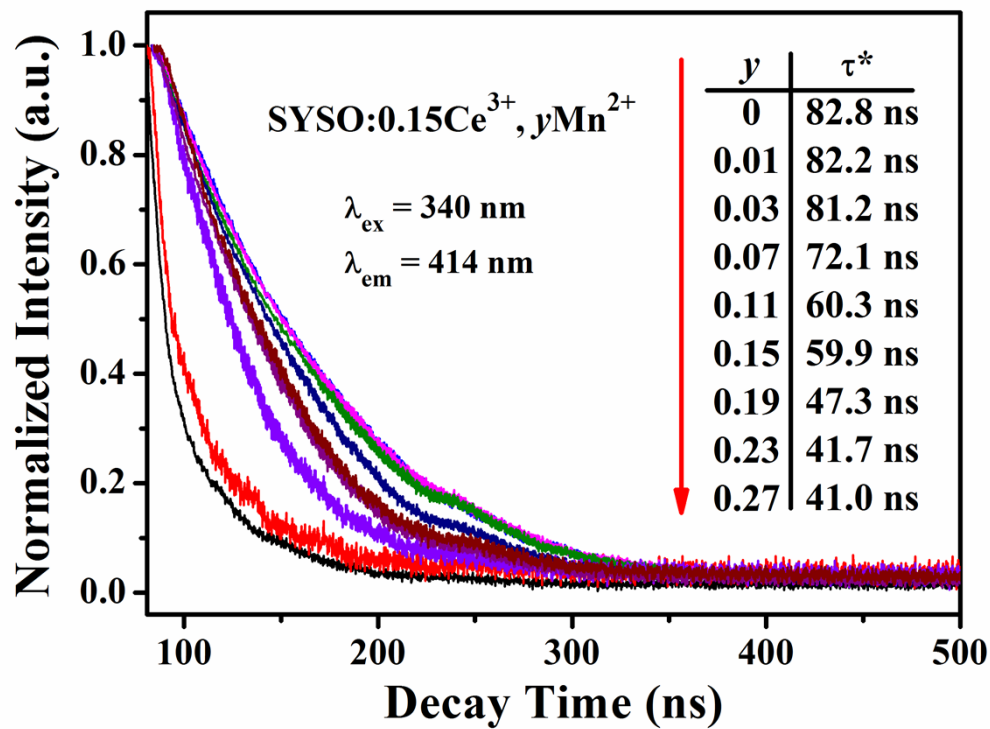

**Figure S8.** Decay curves of Ce<sup>3+</sup> emission monitored at 414 nm for SYSO:0.15Ce<sup>3+</sup>, yMn<sup>2+</sup> ( $y = 0, 0.01, 0.03, 0.07, 0.11, 0.15, 0.19, 0.23$  and  $0.27$ ) under excitation at 340 nm.

**Table S1.** The integral intensity and ratio of the Gaussian peaks fitting of SYSO:*m*Ce<sup>3+</sup> at 400 nm, 420 nm, and 450 nm, respectively.

| <i>m</i> | 400 nm   | 420 nm   | 450 nm   | ratio       |
|----------|----------|----------|----------|-------------|
| 0.01     | 13959782 | 26231280 | 18212926 | 1:1.88:1.30 |
| 0.05     | 22512548 | 45777373 | 32400194 | 1:2.03:1.44 |
| 0.11     | 29161561 | 63568220 | 45641352 | 1:2.18:1.57 |
| 0.13     | 31221538 | 69650610 | 51032696 | 1:2.23:1.63 |
| 0.15     | 32424034 | 72454306 | 51905218 | 1:2.24:1.60 |
| 0.17     | 30781358 | 69697328 | 50335947 | 1:2.26:1.64 |
| 0.21     | 25020274 | 54013588 | 38080012 | 1:2.16:1.52 |

**Table S2.** The photoluminescence lifetimes for the SYSO:0.15Ce<sup>3+</sup>, yTb<sup>3+</sup>/zMn<sup>2+</sup> (y = 0 – 0.85; z = 0 – 0.27) samples ( $\lambda_{em} = 340$  nm).

| SYSO:0.15Ce <sup>3+</sup> ,<br>yTb <sup>3+</sup> /zMn <sup>2+</sup> | A <sub>1</sub> | A <sub>2</sub> | A <sub>3</sub> | $\tau_1$ | $\tau_2$ | $\tau_3$ |
|---------------------------------------------------------------------|----------------|----------------|----------------|----------|----------|----------|
| y = 0, z = 0                                                        | 0.000584       | 0.000584       | 0.000584       | 8.28E-08 | 8.28E-08 | 8.28E-08 |
| y = 0.03, z = 0                                                     | 0.000492       | 0.000492       | 0.000492       | 8.01E-08 | 8.01E-08 | 8.01E-08 |
| y = 0.05, z = 0                                                     | 0.000427       | 0.000427       | 0.000427       | 7.69E-08 | 7.69E-08 | 7.69E-08 |
| y = 0.10, z = 0                                                     | 0.000332       | 0.000332       | 0.000332       | 7.49E-08 | 7.49E-08 | 7.49E-08 |
| y = 0.20, z = 0                                                     | 0.000176       | 0.000176       | 0.000176       | 6.45E-08 | 6.45E-08 | 6.45E-08 |
| y = 0.30, z = 0                                                     | 5.61E-05       | 5.61E-05       | 5.61E-05       | 5.33E-08 | 5.33E-08 | 5.33E-08 |
| y = 0.40, z = 0                                                     | -3.7E-11       | 6.07E-12       | 2.47E-06       | 1.54E-08 | 1.4E-08  | 4.1E-08  |
| y = 0.50, z = 0                                                     | 3.96E-06       | 3.96E-06       | 3.96E-06       | 3.82E-08 | 3.82E-08 | 3.82E-08 |
| y = 0.60, z = 0                                                     | 2.38E-06       | 2.38E-06       | 2.38E-06       | 3.59E-08 | 3.59E-08 | 3.59E-08 |
| y = 0.70, z = 0                                                     | 3.23E-07       | 3.23E-07       | 3.23E-07       | 2.96E-08 | 2.96E-08 | 2.96E-08 |
| y = 0.80, z = 0                                                     | 3.49E-08       | 3.49E-08       | 3.49E-08       | 2.48E-08 | 2.48E-08 | 2.48E-08 |
| y = 0.85, z = 0                                                     | 1.44E-10       | 1.44E-10       | 1.44E-10       | 1.79E-08 | 1.79E-08 | 1.79E-08 |
| y = 0, z = 0.01                                                     | 0.00055        | 0.00055        | 0.00055        | 8.22E-08 | 8.22E-08 | 8.22E-08 |
| y = 0, z = 0.03                                                     | 0.000553       | 0.000553       | 0.000553       | 8.12E-08 | 8.12E-08 | 8.12E-08 |
| y = 0, z = 0.07                                                     | 0.000284       | 0.000284       | 0.000284       | 7.2E-08  | 7.2E-08  | 7.2E-08  |
| y = 0, z = 0.11                                                     | 6.99E-05       | 6.99E-05       | 6.99E-05       | 6.03E-08 | 6.03E-08 | 6.03E-08 |
| y = 0, z = 0.15                                                     | 9.82E-05       | 9.82E-05       | 9.82E-05       | 5.99E-08 | 5.99E-08 | 5.99E-08 |
| y = 0, z = 0.19                                                     | 1.64E-05       | 1.64E-05       | 1.63E-05       | 4.73E-08 | 4.73E-08 | 4.73E-08 |
| y = 0, z = 0.23                                                     | -9.2E-13       | 2.22E-13       | 1.35E-06       | 1.36E-08 | 1.27E-08 | 4.17E-08 |
| y = 0, z = 0.27                                                     | -3.7E-11       | 6.07E-12       | 2.47E-06       | 1.54E-08 | 1.4E-08  | 4.1E-08  |
